# Supplementary material
Source: publisher site journal article supplement (https://mbmg.pensoft.net/article/67533/download/suppl/31/)
Supplement: Supplementary file 1

## **Wet grinding of invertebrate bulk samples – a scalable and cost-efficient protocol for metabarcoding and metagenomics**

Supplementary protocol 1 – DIY-DS

For 5 litres mix:

250 ml 12% bleach

1% NaOH

1% Alconox

90 mM sodium bicarbonate

Add 2 liters of ddH<sub>2</sub>O and stir on a magnetic stirrer until no visible particles are left (about 10 – 15 min). Fill up to 5 liters with ddH<sub>2</sub>O and store in a container until use.
